# Supplementary material for: Melanin-manganese nanoparticles with ultrahigh efficient clearance in vivo for tumor-targeting T1 magnetic resonance imaging contrast agent
Source: Royal Society of Chemistry journal article supplement (doi:10.1039/c7bm00635g), 2017-11-21
Supplement: c7bm00635g1.pdf [file c7bm00635g1.pdf]

## Supporting Information

### Title: Melanin-Manganese Nanoparticles with Ultrahigh Efficient Clearance in Vivo for Tumor-Targeting T<sub>1</sub> Magnetic Resonance Imaging Contrast Agent

Wen Xu, Jinghua Sun, Liping Li, Xiaoyang Peng, Ruiping Zhang\*, Binqun Wang\*

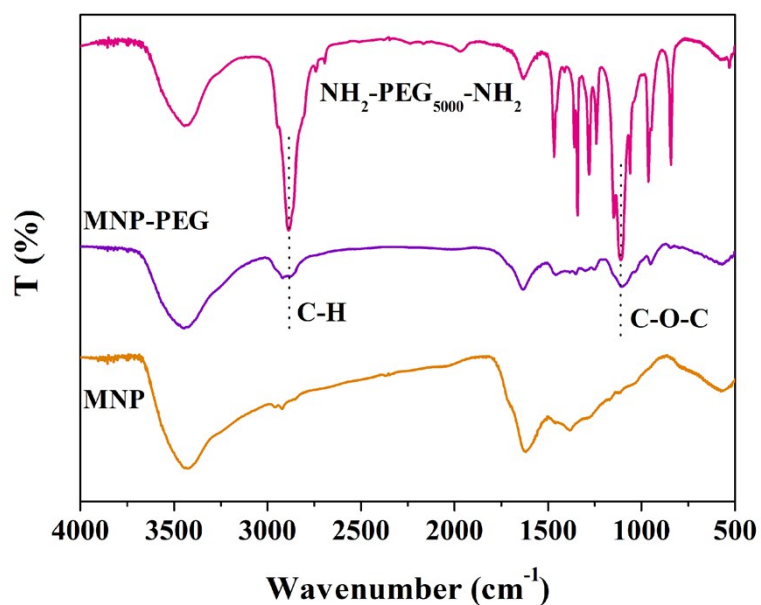

**Figure S1** FT-IR spectra of MNP, MNP-PEG and NH<sub>2</sub>-PEG<sub>5000</sub>-NH<sub>2</sub>.

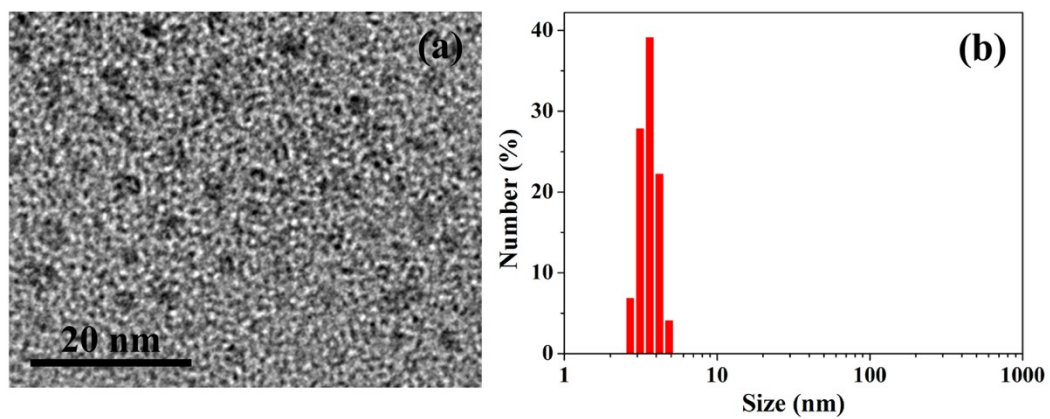

**Figure S2** TEM image (a) and hydrodynamic size distribution graph (b) of MNP-PEG.

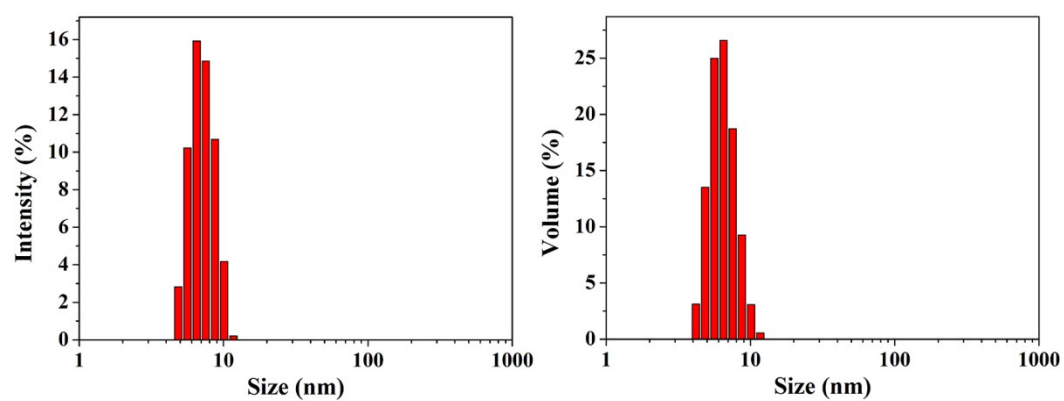

**Figure S3** Hydrodynamic size distribution of the MNP-PEG-Mn in Intensity and Volume modes.

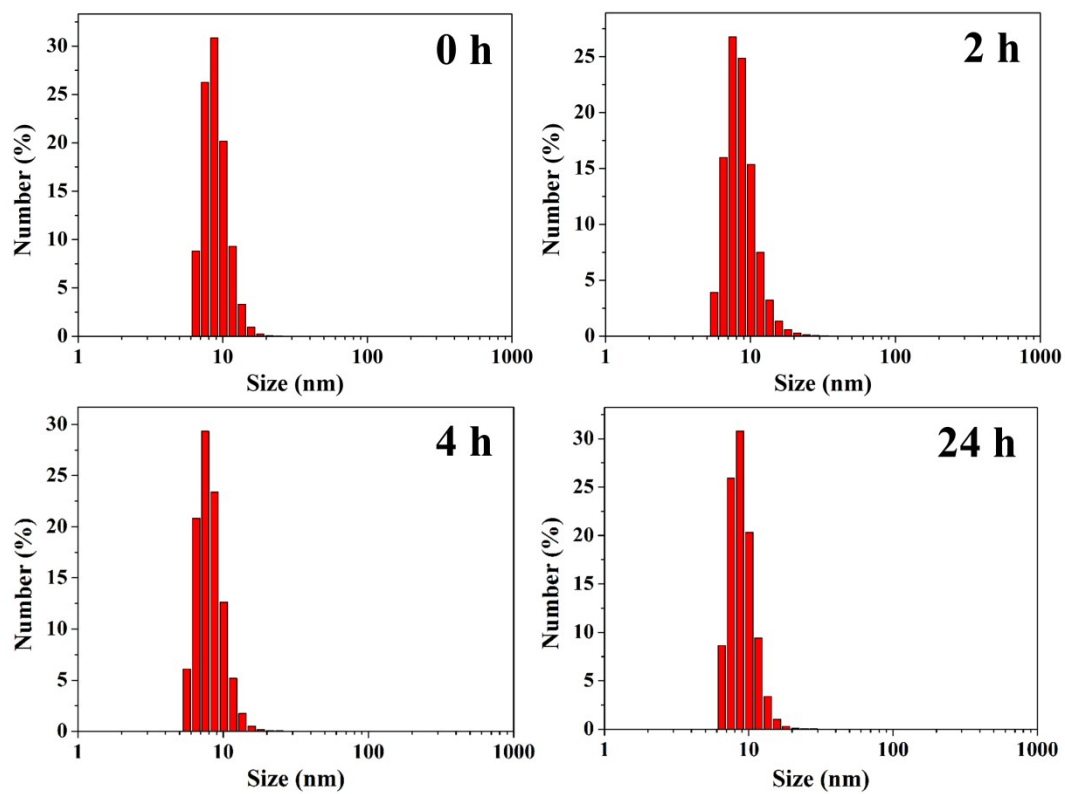

**Figure S4** Hydrodynamic size distribution of the MNP-PEG-Mn during different incubation periods with serum.

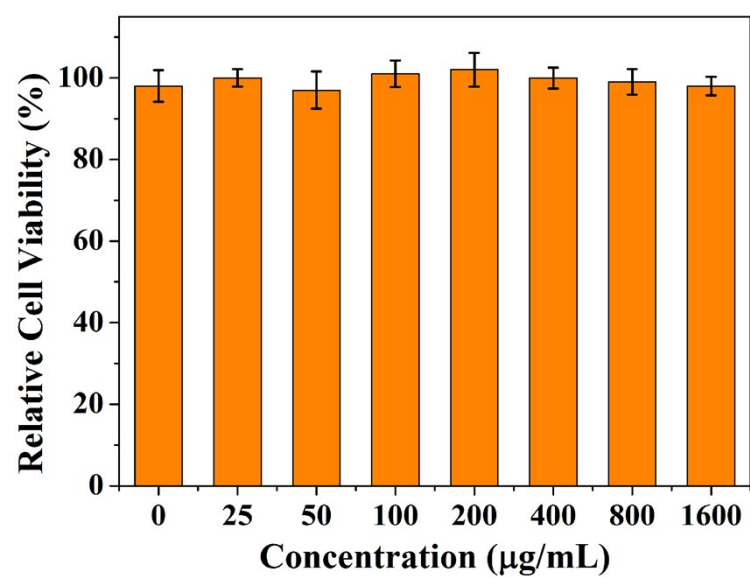

**Figure S5** Cell viabilities of the NIH 3T3 cells after 24 h incubation with MNP-PEG-Mn at various concentrations by MTT assay.
